# Supplementary material
Source: PubMed Central journal article supplement (PMC3813955)
Supplement: NIHMS511923-supplement-supplement.pdf [file NIHMS511923-supplement-supplement.pdf]

## **SUPPLEMENTARY MATERIALS**

### **Data Extraction Strategies**

We used the electronic medical record (EMR), using a proprietary Mayo Clinical Notes Search Tool at Mayo Clinic, Rochester, MN to identify cases from the year 1994 until present. Patients evaluated by the senior investigator (MC) were identified by entering the search queries “pelvic floor dysfunction”, “pelvic floor dyssynergia”, “obstructive defecation”, “constipation”, “slow transit constipation”, “slow transit”, “outlet obstruction”, “constipation *not otherwise stated (nos)*” and “M. Camilleri”. This medical records study was approved by the Mayo Clinic Institutional Review Board. Each patient record was carefully reviewed (SN and TN, supervised by JI and MV-R) according to the primary and secondary diagnoses to corroborate the diagnosis of DD and STC based on pre-specified inclusion criteria (see section on study population). All studies available, particularly the high resolution anorectal manometry test, radioscintigraphy and MRI defecography or barium proctogram, were reviewed by the authors. Once inclusion criteria were satisfied, records were reviewed for clinical, demographic, body mass index, date of diagnosis, number of pregnancies, and abdominal surgeries including hysterectomy.

**Supplementary Table A.** Overall transit and regional colon transit characteristics in different study groups (data show mean  $\pm$  SD, unless otherwise indicated).

| <b>STUDY GROUP</b>                                                    | <b>HEALTHY VOLUNTEERS<br/>(n=211)</b>     | <b>EVACUATION DISORDERS<br/>(n=390)</b>   | <b>SLOW TRANSIT CONSTIPATION<br/>(n=61)</b> |
|-----------------------------------------------------------------------|-------------------------------------------|-------------------------------------------|---------------------------------------------|
| <b>Ascending colon emptying median,(IQR) <math>t_{1/2}</math> (h)</b> | <b>16.6 (8.8 – 19.1)</b>                  | <b>18.4 (14.9 – 24.0)</b>                 | <b>22.4 (16.9 – 33.2)</b>                   |
| <b>[10<sup>th</sup> – 90<sup>th</sup> percentile]</b>                 | <b>(n=188)</b><br>[8.0 – 26.1]            | <b>(n=152)</b><br>[4.0-27.8]              | <b>(n=40)</b><br>[13.6-40.6]                |
| Males                                                                 | 16.4(8.0-17.6) (n=63)                     | 16.7(14.9-24.0) (n=34)                    | 20.2 (17.5-22.9) (n=2)                      |
| Females                                                               | 16.6 (11.0-20.3) (n=125)                  | 19.2(14.8-24.0) (n=118)                   | 22.5 (16.7-33.9) (n=38)                     |
| <b>Geometric center at 24 hours <math>\pm</math> SD</b>               | <b>2.4 <math>\pm</math> 0.9 (n = 209)</b> | <b>2.1 <math>\pm</math> 1.1 (n = 277)</b> | <b>1.5 <math>\pm</math> 0.4 (n = 60)</b>    |
| <b>[10<sup>th</sup> – 90<sup>th</sup> percentile]</b>                 | [1.47 – 3.87]                             | [1.10 – 3.80]                             | [1.10 – 2.00]                               |
| Males                                                                 | 2.7 $\pm$ 0.9 (n = 72)                    | 2.4 $\pm$ 1.0 (n = 49)                    | 1.4 $\pm$ 0.2 (n = 5)                       |
| Females                                                               | 2.3 $\pm$ 0.9 (n = 137)                   | 2.1 $\pm$ 1.1 (n = 228)                   | 1.5 $\pm$ 0.4 (n = 55)                      |
| <b>- Percentage in ascending colon <math>\pm</math> SD</b>            | <b>20 <math>\pm</math> 20 (n = 190)</b>   | <b>35 <math>\pm</math> 25 (n = 161)</b>   | <b>45 <math>\pm</math> 27 (n = 40)</b>      |
| Males                                                                 | 14 $\pm$ 15 (n = 65)                      | 32 $\pm$ 28 (n = 35)                      | 37 $\pm$ 15 (n = 2)                         |
| Females                                                               | 23 $\pm$ 22 (n = 125)                     | 36 $\pm$ 24 (n = 126)                     | 45 $\pm$ 27 (n = 38)                        |
| <b>- Percentage in transverse colon <math>\pm</math> SD</b>           | <b>43 <math>\pm</math> 24 (n = 190)</b>   | <b>37 <math>\pm</math> 24 (n = 161)</b>   | <b>46 <math>\pm</math> 25 (n = 40)</b>      |
| Males                                                                 | 34 $\pm$ 20 (n = 65)                      | 32 $\pm$ 19 (n = 35)                      | 60 $\pm$ 20 (n = 2)                         |
| Females                                                               | 47 $\pm$ 25 (n = 125)                     | 38 $\pm$ 25 (n = 126)                     | 45 $\pm$ 25 (n = 38)                        |
| <b>- Percentage in descending colon <math>\pm</math> SD</b>           | <b>18 <math>\pm</math> 19 (n = 190)</b>   | <b>11 <math>\pm</math> 14 (n = 161)</b>   | <b>4 <math>\pm</math> 9 (n = 40)</b>        |
| Males                                                                 | 25 $\pm$ 20 (n = 65)                      | 18 $\pm$ 19 (n = 35)                      | 4 $\pm$ 5 (n = 2)                           |
| Females                                                               | 14 $\pm$ 17 (n = 125)                     | 9 $\pm$ 12 (n = 126)                      | 4 $\pm$ 9 (n = 38)                          |
| <b>- Percentage in rectosigmoid <math>\pm</math> SD</b>               | <b>10 <math>\pm</math> 16 (n = 190)</b>   | <b>4 <math>\pm</math> 9 (n = 161)</b>     | <b>1 <math>\pm</math> 4 (n = 40)</b>        |
| Males                                                                 | 15 $\pm$ 18 (n = 65)                      | 6 $\pm$ 9 (n = 35)                        | 0 $\pm$ 0 (n = 2)                           |
| Females                                                               | 7 $\pm$ 14 (n = 125)                      | 4 $\pm$ 9 (n = 126)                       | 1 $\pm$ 4 (n = 38)                          |
| <b>- Percentage in stool <math>\pm</math> SD</b>                      | <b>8 <math>\pm</math> 22 (n = 190)</b>    | <b>9 <math>\pm</math> 22 (n = 161)</b>    | <b>1 <math>\pm</math> 3 (n = 40)</b>        |
| Males                                                                 | 11 $\pm$ 25 (n = 65)                      | 11 $\pm$ 24 (n = 35)                      | 0 $\pm$ 0 (n = 2)                           |
| Females                                                               | 7 $\pm$ 21 (n = 125)                      | 8 $\pm$ 21 (n = 127)                      | 1 $\pm$ 3 (n = 41)                          |
| <b>Geometric center at 48 hours <math>\pm</math> SD</b>               | <b>3.6 <math>\pm</math> 1.1 (n = 191)</b> | <b>2.6 <math>\pm</math> 0.9 (n = 42)</b>  | <b>2.1 <math>\pm</math> 0.5 (n = 42)</b>    |
| <b>[10<sup>th</sup> – 90<sup>th</sup> percentile]</b>                 | [2.13 – 5.00]                             | [1.80 – 3.80]                             | [1.6 – 2.7]                                 |
| Males                                                                 | 4.1 $\pm$ 1.0 (n = 61)                    | 2.8 $\pm$ 0.7 (n = 4)                     | 2.3 $\pm$ 0.3 (n = 2)                       |
| Females                                                               | 3.4 $\pm$ 1.0 (n = 130)                   | 2.6 $\pm$ 0.9 (n = 38)                    | 2.1 $\pm$ 0.5 (n = 40)                      |
| <b>- Percentage in ascending colon <math>\pm</math> SD</b>            | <b>3 <math>\pm</math> 7 (n = 172)</b>     | <b>12 <math>\pm</math> 8 (n = 35)</b>     | <b>20 <math>\pm</math> 18 (n = 31)</b>      |
| Males                                                                 | 2 $\pm$ 7 (n = 54)                        | 12 $\pm$ 3 (n = 4)                        | 10 (n = 1)                                  |
| Females                                                               | 3 $\pm$ 7 (n = 118)                       | 12 $\pm$ 8 (n = 31)                       | 21 $\pm$ 18 (n = 30)                        |
| <b>- Percentage in transverse colon <math>\pm</math> SD</b>           | <b>25 <math>\pm</math> 28 (n = 172)</b>   | <b>38 <math>\pm</math> 25 (n = 35)</b>    | <b>54 <math>\pm</math> 20 (n = 31)</b>      |
| Males                                                                 | 13 $\pm$ 21 (n = 54)                      | 40 $\pm$ 27 (n = 4)                       | 39 (n = 1)                                  |
| Females                                                               | 30 $\pm$ 30 (n = 118)                     | 38 $\pm$ 25 (n = 31)                      | 55 $\pm$ 21 (n = 30)                        |
| <b>- Percentage in descending colon <math>\pm</math> SD</b>           | <b>17 <math>\pm</math> 18 (n = 172)</b>   | <b>22 <math>\pm</math> 15 (n = 35)</b>    | <b>18 <math>\pm</math> 17 (n = 31)</b>      |
| Males                                                                 | 10 $\pm$ 14 (n = 54)                      | 24 $\pm$ 15 (n = 4)                       | 43 (n = 1)                                  |
| Females                                                               | 20 $\pm$ 19 (n = 118)                     | 22 $\pm$ 16 (n = 31)                      | 17 $\pm$ 17 (n = 30)                        |
| <b>- Percentage in rectosigmoid <math>\pm</math> SD</b>               | <b>18 <math>\pm</math> 23 (n = 172)</b>   | <b>12 <math>\pm</math> 17 (n = 35)</b>    | <b>5 <math>\pm</math> 10 (n = 31)</b>       |
| Males                                                                 | 14 $\pm$ 22 (n = 54)                      | 10 $\pm$ 6 (n = 4)                        | 8 (n = 1)                                   |
| Females                                                               | 20 $\pm$ 23 (n = 118)                     | 12 $\pm$ 18 (n = 31)                      | 5 $\pm$ 10 (n = 30)                         |
| <b>- Percentage in stool <math>\pm</math> SD</b>                      | <b>37 <math>\pm</math> 40 (n = 172)</b>   | <b>17 <math>\pm</math> 26 (n = 35)</b>    | <b>2 <math>\pm</math> 6 (n = 31)</b>        |
| Males                                                                 | 61 $\pm$ 39 (n = 54)                      | 14 $\pm$ 23 (n = 4)                       | 0 (n = 1)                                   |
| Females                                                               | 27 $\pm$ 36 (n = 118)                     | 17 $\pm$ 27 (n = 31)                      | 2 $\pm$ 6 (n = 30)                          |
